# Supplementary material for: Expression of genes involved in neurogenesis, and neuronal precursor cell proliferation and development: Novel pathways of human ovarian granulosa cell differentiation and transdifferentiation capability in vitro
Source: PubMed Central journal article supplement (PMC7057781; doi:10.3892/mmr.2020.10972), 2020-01-31
Supplement: Supplementary_Data.pdf [file Supplementary_Data.pdf]

Table SI. Gene symbols, fold changes in expression, Entrez gene IDs and corrected P-values of studied genes.

| Gene symbol      | Fold change D1/D7 | Fold change D1/D15 | Fold change D1/D30 | Adjusted P-value D1/D7 | Adjusted P-value D1/D15 | Adjusted P-value D1/D30 | Entrezgene ID |
|------------------|-------------------|--------------------|--------------------|------------------------|-------------------------|-------------------------|---------------|
| <i>RRM1</i>      | 2.021768          | 2.206091           | 1.636671           | 0.101894               | 0.047511                | 0.029857                | 6240          |
| <i>SRGAP2</i>    | 2.024766          | 2.246311           | 1.986332           | 0.397802               | 0.031081                | 0.018244                | 23380         |
| <i>LRFN4</i>     | 2.032537          | 1.56422            | 2.050337           | 0.093162               | 0.031081                | 0.102524                | 78999         |
| <i>INPP5J</i>    | 2.037824          | 1.725832           | 1.634614           | 0.701629               | 0.030205                | 0.05892                 | 27124         |
| <i>RITAI</i>     | 2.045079          | 1.877727           | 2.524093           | 0.07383                | 0.03106                 | 0.040661                | 84934         |
| <i>PPP3CA</i>    | 2.05061           | 1.913019           | 1.851225           | 0.801999               | 0.023258                | 0.028641                | 5530          |
| <i>CTNND1</i>    | 2.07606           | 2.059376           | 2.493493           | 0.053947               | 0.005581                | 0.005289                | 1500          |
| <i>CASP2</i>     | 2.130807          | 1.871144           | 1.640512           | 0.341741               | 0.021112                | 0.033354                | 835           |
| <i>VIM</i>       | 2.16462           | 2.195607           | 2.168564           | 0.898534               | 0.007447                | 0.006371                | 7431          |
| <i>KIDINS220</i> | 2.184925          | 1.958272           | 1.685647           | 0.218728               | 0.011981                | 0.016759                | 57498         |
| <i>TGFBR1</i>    | 2.188996          | 1.585418           | 1.46801            | 0.607609               | 0.026412                | 0.106546                | 7046          |
| <i>LGALS1</i>    | 2.194273          | 2.541993           | 2.831199           | 0.367503               | 0.012251                | 0.006371                | 3956          |
| <i>KIF3A</i>     | 2.19478           | 1.850005           | 2.377716           | 0.120395               | 0.024245                | 0.04543                 | 11127         |
| <i>NCS1</i>      | 2.2783            | 2.131948           | 3.105525           | 0.083209               | 0.047675                | 0.053779                | 23413         |
| <i>UST</i>       | 2.286128          | 2.010455           | 3.614628           | 0.011059               | 0.033646                | 0.049568                | 10090         |
| <i>MAFK</i>      | 2.295558          | 1.799692           | 1.958553           | 0.636237               | 0.037734                | 0.090026                | 7975          |
| <i>CDH2</i>      | 2.31119           | 1.986439           | 1.92385            | 0.790919               | 0.01156                 | 0.018732                | 1000          |
| <i>ARHGEF10</i>  | 2.311249          | 2.788637           | 2.663974           | 0.762668               | 0.022675                | 0.010843                | 9639          |
| <i>APBB2</i>     | 2.369929          | 2.427177           | 1.940409           | 0.066329               | 0.006592                | 0.00555                 | 323           |
| <i>VEGFC</i>     | 2.371705          | 2.424384           | 2.313969           | 0.645536               | 0.005848                | 0.004928                | 7424          |
| <i>LLGL2</i>     | 2.377292          | 1.636103           | 1.254952           | 0.167014               | 0.032817                | 0.138612                | 3993          |
| <i>OXCT1</i>     | 2.382383          | 1.80451            | 1.980136           | 0.339645               | 0.004574                | 0.013521                | 5019          |
| <i>GRIK1</i>     | 2.383064          | 1.193713           | 0.890863           | 0.143759               | 0.035814                | 0.622602                | 2897          |
| <i>DLG3</i>      | 2.436979          | 2.551924           | 2.641258           | 0.828416               | 0.021919                | 0.016638                | 1741          |
| <i>SKI</i>       | 2.46271           | 2.50275            | 3.341721           | 0.009359               | 0.002709                | 0.002478                | 6497          |
| <i>SPTB</i>      | 2.495918          | 1.027184           | 1.131062           | 0.309574               | 0.003611                | 0.900817                | 6710          |
| <i>BCR</i>       | 2.507611          | 2.251619           | 2.333804           | 0.796931               | 0.013329                | 0.017344                | 613           |
| <i>NDST1</i>     | 2.511612          | 1.661929           | 2.158918           | 0.238363               | 0.045663                | 0.189784                | 3340          |
| <i>PDGFC</i>     | 2.511784          | 2.418348           | 1.507838           | 0.036645               | 0.031252                | 0.031879                | 56034         |
| <i>SMARCD3</i>   | 2.528987          | 2.267934           | 1.75636            | 0.085402               | 0.010645                | 0.013543                | 6604          |
| <i>ALDH5A1</i>   | 2.558353          | 2.314292           | 1.677168           | 0.05644                | 0.013554                | 0.016975                | 7915          |
| <i>ALCAM</i>     | 2.60493           | 2.795375           | 2.424953           | 0.370225               | 0.015947                | 0.011234                | 214           |
| <i>CIT</i>       | 2.640185          | 2.962862           | 2.672979           | 0.651374               | 0.049375                | 0.031522                | 11113         |
| <i>DDR1</i>      | 2.662986          | 2.94323            | 3.572125           | 0.220422               | 0.013283                | 0.008572                | 780           |
| <i>RAPGEF2</i>   | 2.699117          | 2.710037           | 2.220224           | 0.229365               | 0.014947                | 0.012877                | 9693          |
| <i>PTPRF</i>     | 2.702878          | 4.770853           | 4.265291           | 0.577868               | 0.03106                 | 0.006932                | 5792          |
| <i>CHODL</i>     | 2.702979          | 1.178002           | 2.376011           | 0.001895               | 0.010781                | 0.544138                | 140578        |
| <i>HDAC11</i>    | 2.7084            | 2.836511           | 3.386951           | 0.440859               | 0.044834                | 0.034765                | 79885         |
| <i>ETV5</i>      | 2.708423          | 2.852748           | 3.23393            | 0.579209               | 0.044049                | 0.033713                | 2119          |
| <i>KIAA1524</i>  | 2.717902          | 2.241218           | 2.636196           | 0.388991               | 0.023517                | 0.040249                | 57650         |
| <i>SRD5A1</i>    | 2.760316          | 2.128315           | 2.577624           | 0.355952               | 0.029719                | 0.063092                | 6715          |
| <i>PREX1</i>     | 2.76119           | 2.010922           | 2.47796            | 0.225131               | 0.015567                | 0.042697                | 57580         |
| <i>FYN</i>       | 2.765514          | 2.90417            | 2.632699           | 0.611206               | 0.025738                | 0.020094                | 2534          |
| <i>AMIGO2</i>    | 2.822957          | 2.242601           | 1.994635           | 0.590445               | 0.034722                | 0.064087                | 347902        |
| <i>H2AFX</i>     | 2.909718          | 2.789465           | 2.46423            | 0.59303                | 0.038499                | 0.038925                | 3014          |
| <i>PLXNB2</i>    | 2.946326          | 3.461029           | 3.859933           | 0.530261               | 0.015373                | 0.008749                | 23654         |
| <i>MACF1</i>     | 2.96498           | 2.495056           | 3.184634           | 0.179                  | 0.014122                | 0.021586                | 23499         |
| <i>MAP4</i>      | 3.013993          | 2.897716           | 3.017057           | 0.550918               | 0.000975                | 0.001052                | 4134          |
| <i>MEF2A</i>     | 3.019241          | 3.647594           | 2.798678           | 0.05228                | 0.00411                 | 0.002502                | 4205          |
| <i>INPP5F</i>    | 3.042892          | 2.209785           | 3.136749           | 0.08512                | 0.015904                | 0.039283                | 22876         |
| <i>MYRF</i>      | 3.065858          | 2.714928           | 2.634595           | 0.739561               | 0.002201                | 0.002579                | 745           |
| <i>BID</i>       | 3.13175           | 2.87727            | 4.106849           | 0.097974               | 0.018015                | 0.020233                | 637           |
| <i>NR2F2</i>     | 3.151739          | 4.366718           | 9.598608           | 0.002299               | 0.011103                | 0.004543                | 7026          |
| <i>MYO5A</i>     | 3.192165          | 2.99197            | 2.953521           | 0.921307               | 0.00532                 | 0.005812                | 4644          |
| <i>CAPRINI</i>   | 3.265348          | 2.703495           | 3.057969           | 0.607973               | 0.031458                | 0.047338                | 4076          |
| <i>EHD1</i>      | 3.288062          | 2.32814            | 2.36694            | 0.925579               | 0.012729                | 0.032111                | 10938         |
| <i>PMP22</i>     | 3.295479          | 2.73516            | 2.78587            | 0.913533               | 0.011073                | 0.016304                | 5376          |

Table SI. Continued.

| Gene symbol     | Fold change D1/D7 | Fold change D1/D15 | Fold change D1/D30 | Adjusted P-value D1/D7 | Adjusted P-value D1/D15 | Adjusted P-value D1/D30 | Entrezgene ID |
|-----------------|-------------------|--------------------|--------------------|------------------------|-------------------------|-------------------------|---------------|
| <i>SPTBN1</i>   | 3.304848          | 2.030568           | 2.916961           | 0.077568               | 0.012773                | 0.054511                | 6711          |
| <i>NEGR1</i>    | 3.305925          | 2.757526           | 7.004404           | 6.76E-05               | 0.002435                | 0.003428                | 257194        |
| <i>AGRN</i>     | 3.309808          | 3.519888           | 3.736432           | 0.713208               | 0.009464                | 0.007131                | 375790        |
| <i>CTHRC1</i>   | 3.347823          | 4.023322           | 6.926104           | 0.07344                | 0.039801                | 0.023368                | 115908        |
| <i>FKBP1B</i>   | 3.387376          | 3.237422           | 3.318001           | 0.78001                | 0.001599                | 0.001564                | 2281          |
| <i>SPINT2</i>   | 3.398409          | 2.431264           | 1.779229           | 0.296779               | 0.049554                | 0.106068                | 10653         |
| <i>DAB2IP</i>   | 3.416795          | 3.13563            | 2.853393           | 0.58502                | 0.010395                | 0.011322                | 153090        |
| <i>MAP1B</i>    | 3.423203          | 2.404338           | 3.267402           | 0.150889               | 0.01537                 | 0.038091                | 4131          |
| <i>NEDD4L</i>   | 3.476711          | 4.917672           | 3.080767           | 0.026445               | 0.009286                | 0.003902                | 23327         |
| <i>CADMI</i>    | 3.538659          | 3.216645           | 2.079601           | 0.105235               | 0.026393                | 0.03                    | 23705         |
| <i>MELK</i>     | 3.610806          | 3.068771           | 2.326444           | 0.279117               | 0.026413                | 0.035583                | 9833          |
| <i>CDK6</i>     | 3.72549           | 3.761877           | 4.232504           | 0.630469               | 0.024327                | 0.021586                | 1021          |
| <i>FZD2</i>     | 3.767679          | 3.278544           | 13.84389           | 6.05E-05               | 0.005716                | 0.007268                | 2535          |
| <i>SEMA4F</i>   | 3.786062          | 4.162757           | 3.646759           | 0.583079               | 0.022269                | 0.015942                | 10505         |
| <i>HDAC5</i>    | 3.786869          | 2.483511           | 2.146236           | 0.370811               | 0.006147                | 0.017928                | 10014         |
| <i>ATL1</i>     | 4.035             | 2.978216           | 3.397891           | 0.152485               | 0.000966                | 0.001702                | 51062         |
| <i>WLS</i>      | 4.245624          | 3.487205           | 5.789078           | 0.052296               | 0.01351                 | 0.01881                 | 79971         |
| <i>ENC1</i>     | 4.245979          | 4.134794           | 3.264972           | 0.309849               | 0.014021                | 0.013059                | 8507          |
| <i>DBN1</i>     | 4.712013          | 3.825961           | 5.302759           | 0.085375               | 0.004498                | 0.006368                | 1627          |
| <i>RACGAP1</i>  | 4.735836          | 5.297663           | 5.276126           | 0.988633               | 0.024108                | 0.017461                | 29127         |
| <i>MAOB</i>     | 4.747149          | 3.859033           | 2.809173           | 0.097754               | 0.004713                | 0.006671                | 4129          |
| <i>NDRG4</i>    | 4.817497          | 7.098036           | 3.324764           | 0.055552               | 0.037583                | 0.017119                | 65009         |
| <i>EPHA2</i>    | 4.8202            | 2.854057           | 3.518869           | 0.174434               | 0.002778                | 0.008316                | 1969          |
| <i>VCL</i>      | 4.864573          | 3.380753           | 5.783599           | 0.089052               | 0.020792                | 0.04079                 | 7414          |
| <i>YWHAH</i>    | 4.894869          | 4.460129           | 4.853179           | 0.554234               | 0.002681                | 0.002934                | 7533          |
| <i>SFRP1</i>    | 5.256953          | 6.418839           | 5.765165           | 0.630468               | 0.009045                | 0.005699                | 6422          |
| <i>TUBB3</i>    | 5.308206          | 3.291997           | 4.796059           | 0.156564               | 0.011903                | 0.029655                | 10381         |
| <i>SULF2</i>    | 5.382245          | 8.025055           | 2.158912           | 0.005145               | 0.026926                | 0.012415                | 55959         |
| <i>FZD6</i>     | 5.4593            | 6.975979           | 6.816073           | 0.930615               | 0.015024                | 0.008617                | 8323          |
| <i>TACC3</i>    | 5.531522          | 6.683994           | 5.408581           | 0.378566               | 0.009647                | 0.006215                | 10460         |
| <i>STIL</i>     | 5.6288            | 5.40042            | 4.900424           | 0.716835               | 0.014125                | 0.01345                 | 6491          |
| <i>GRIP1</i>    | 5.726394          | 4.406289           | 4.064269           | 0.718133               | 0.007818                | 0.011576                | 23426         |
| <i>KIF14</i>    | 5.876355          | 6.330966           | 5.326401           | 0.526469               | 0.01338                 | 0.010384                | 9928          |
| <i>ETS1</i>     | 5.91011           | 7.886957           | 6.458214           | 0.473602               | 0.01398                 | 0.007791                | 2113          |
| <i>DHFR</i>     | 6.100375          | 6.873142           | 4.669302           | 0.005748               | 0.000681                | 0.000531                | 1719          |
| <i>TIMP2</i>    | 6.200145          | 7.209695           | 8.681742           | 0.06879                | 0.00054                 | 0.000453                | 7077          |
| <i>BOK</i>      | 6.252747          | 10.38335           | 9.720958           | 0.825161               | 0.016775                | 0.006967                | 666           |
| <i>APLP1</i>    | 6.724176          | 11.70933           | 10.39692           | 0.567198               | 0.004562                | 0.002177                | 333           |
| <i>DCLK1</i>    | 6.825138          | 7.638479           | 5.965188           | 0.304473               | 0.006409                | 0.004872                | 9201          |
| <i>GLI2</i>     | 6.93552           | 7.103782           | 14.11276           | 0.072541               | 0.019199                | 0.016304                | 2736          |
| <i>PRICKLE1</i> | 7.301909          | 4.726273           | 9.353689           | 0.042893               | 0.010666                | 0.020201                | 144165        |
| <i>NRXN3</i>    | 7.989118          | 14.67486           | 31.63559           | 0.107869               | 0.033342                | 0.013494                | 9369          |
| <i>DPYSL2</i>   | 8.828498          | 15.39167           | 20.07619           | 0.157396               | 0.0021                  | 0.001052                | 1808          |
| <i>DKK1</i>     | 8.954961          | 9.635247           | 10.15533           | 0.777067               | 0.002435                | 0.002043                | 22943         |
| <i>FAM150B</i>  | 8.963014          | 7.693274           | 15.96865           | 0.073842               | 0.016194                | 0.017889                | 285016        |
| <i>CENPF</i>    | 9.293946          | 12.37396           | 10.64819           | 0.545598               | 0.004852                | 0.003253                | 1063          |
| <i>SPPI</i>     | 9.788134          | 0.95252            | 2.839958           | 0.040754               | 0.027852                | 0.965318                | 6696          |
| <i>DIXDC1</i>   | 10.19146          | 9.163015           | 15.31045           | 0.011713               | 0.001194                | 0.001266                | 85458         |
| <i>BMP4</i>     | 10.48954          | 17.22155           | 21.24347           | 0.611556               | 0.020467                | 0.010072                | 652           |
| <i>HMGB2</i>    | 10.66394          | 11.73624           | 10.31678           | 0.516114               | 0.002329                | 0.001834                | 3148          |
| <i>SSTR1</i>    | 11.71047          | 17.24349           | 25.57376           | 0.213809               | 0.006481                | 0.003779                | 6751          |
| <i>ANKRD1</i>   | 11.88737          | 2.508097           | 2.617912           | 0.925684               | 0.024792                | 0.27876                 | 27063         |
| <i>NDRG1</i>    | 11.92954          | 22.62052           | 20.31863           | 0.594171               | 0.002201                | 0.001102                | 10397         |
| <i>WEE1</i>     | 12.58023          | 12.68202           | 11.20957           | 0.693251               | 0.00688                 | 0.006215                | 7465          |
| <i>SH3GL3</i>   | 12.80461          | 5.936084           | 8.941457           | 0.106988               | 0.002681                | 0.006872                | 6457          |
| <i>TNFRSF21</i> | 13.29178          | 11.52699           | 19.84632           | 0.305804               | 0.029183                | 0.03114                 | 27242         |
| <i>ANXA3</i>    | 13.40458          | 19.42721           | 21.68463           | 0.821712               | 0.025705                | 0.015167                | 306           |

Table SI. Continued.

| Gene symbol   | Fold change D1/D7 | Fold change D1/D15 | Fold change D1/D30 | Adjusted P-value D1/D7 | Adjusted P-value D1/D15 | Adjusted P-value D1/D30 | Entrezgene ID |
|---------------|-------------------|--------------------|--------------------|------------------------|-------------------------|-------------------------|---------------|
| <i>TWIST1</i> | 13.41066          | 16.06133           | 20.74144           | 0.178018               | 0.001349                | 0.001064                | 7291          |
| <i>CDK1</i>   | 13.88075          | 18.56825           | 12.19633           | 0.085503               | 0.002233                | 0.001491                | 983           |
| <i>GAS6</i>   | 13.92343          | 14.85424           | 26.70902           | 0.093827               | 0.005943                | 0.005065                | 2621          |
| <i>STMN1</i>  | 14.15491          | 16.77585           | 16.17827           | 0.887561               | 0.003396                | 0.002666                | 3925          |
| <i>ARNT2</i>  | 14.51122          | 12.33988           | 16.76564           | 0.353657               | 0.006258                | 0.006839                | 9915          |
| <i>CDC20</i>  | 14.63169          | 16.17955           | 15.95021           | 0.970839               | 0.011951                | 0.009375                | 991           |
| <i>ASPM</i>   | 15.06876          | 21.27444           | 15.88402           | 0.511297               | 0.016229                | 0.009871                | 259266        |
| <i>NTN4</i>   | 15.2823           | 9.026144           | 9.0834             | 0.976884               | 0.002192                | 0.003428                | 59277         |
| <i>CRIMI</i>  | 16.63216          | 15.16397           | 17.96461           | 0.422677               | 0.001635                | 0.00157                 | 51232         |
| <i>NANOS1</i> | 16.71367          | 17.47953           | 9.848209           | 0.047777               | 0.002489                | 0.002264                | 340719        |
| <i>FRY</i>    | 16.7709           | 14.68067           | 14.90368           | 0.971378               | 0.012828                | 0.013034                | 10129         |
| <i>CD9</i>    | 16.80523          | 13.90259           | 17.17638           | 0.306295               | 0.00152                 | 0.00157                 | 928           |
| <i>ITGA3</i>  | 16.92781          | 18.84218           | 22.47009           | 0.74729                | 0.027709                | 0.022255                | 3675          |
| <i>ATP8B1</i> | 19.91928          | 13.4672            | 22.05294           | 0.127331               | 0.003449                | 0.00471                 | 5205          |
| <i>DFNA5</i>  | 21.0067           | 17.97532           | 21.3502            | 0.429055               | 0.001486                | 0.001498                | 1687          |
| <i>OXTR</i>   | 38.38617          | 22.60881           | 54.85452           | 0.002981               | 0.00068                 | 0.001012                | 5021          |
| <i>CLDN11</i> | 50.24748          | 59.01065           | 68.98347           | 0.799101               | 0.014803                | 0.011576                | 5010          |
